# Supplementary material for: Assessing Motor Performance in Preschool Children: The Zurich Neuromotor Assessment-2 and the Movement Assessment Battery for Children-2
Source: PubMed Central journal article supplement (PMC8414808; doi:10.1177/00315125211025246), 2021-06-15
Supplement: sj-pdf-1-pms-10.1177_00315125211025246.pdf [file sj-pdf-1-pms-10.1177_00315125211025246.pdf]

## Appendix B

Table B.1

*Descriptives on the ZNA-2 and the MABC-2 in 3-year old children*

|                          | Original |          |           | Pooled   |          |           | Effect size |
|--------------------------|----------|----------|-----------|----------|----------|-----------|-------------|
|                          | <i>n</i> | <i>M</i> | <i>SD</i> | <i>n</i> | <i>M</i> | <i>SD</i> |             |
| Pegboard (d)             | 69       | .17      | .99       | 72       | .15      | 1.00      | .02         |
| Pegboard (nd)            | 67       | .03      | 1.10      | 72       | .00      | 1.14      | .02         |
| Bolts (d)                | 68       | 1.18     | .93       | 72       | 1.18     | .94       | .00         |
| Bolts (nd)               | 63       | .87      | .93       | 72       | .84      | .97       | .04         |
| Beads                    | 68       | .19      | .89       | 72       | .20      | .90       | -.01        |
| Repetitive foot (d)*     | 69       | -.55     | 1.37      |          |          |           |             |
| Repetitive foot (nd)*    | 66       | -.81     | 1.50      |          |          |           |             |
| Alternating foot (d)*    | 65       | -.41     | .87       |          |          |           |             |
| Alternating foot (nd)*   | 65       | -.18     | .93       |          |          |           |             |
| Repetitive hand (d)*     | 68       | -1.17    | 1.14      |          |          |           |             |
| Repetitive hand (nd)*    | 65       | -1.00    | 1.26      |          |          |           |             |
| Alternating hand (d)*    | 66       | -.50     | .97       |          |          |           |             |
| Alternating hand (nd)*   | 64       | -.75     | .84       |          |          |           |             |
| Repetitive fingers (d)*  | 65       | -1.03    | 1.61      |          |          |           |             |
| Repetitive fingers (nd)* | 67       | -.68     | 1.67      |          |          |           |             |
| Sequential fingers (d)*  | 58       | .12      | .62       |          |          |           |             |
| Sequential fingers (nd)* | 58       | .11      | .63       |          |          |           |             |

---

|                      |    |       |      |    |       |      |      |
|----------------------|----|-------|------|----|-------|------|------|
| Jumping sideways     | 64 | -.05  | .04  | 72 | -.06  | .27  | .38  |
| Chair rise           | 64 | -.87  | 1.29 | 72 | -.85  | 1.32 | -.02 |
| Long jump            | 61 | -.49  | 1.26 | 72 | -.45  | 1.28 | -.03 |
| Fine motor skills    | 55 | .83   | .94  | 72 | .66   | .99  | -.17 |
| Pure motor skills    | 38 | -.82  | 1.37 | 72 | -.95  | .91  | -.14 |
| Static balance       | 70 | .00   | .91  | 72 | .00   | .90  | .00  |
| Dynamic balance      | 49 | -.68  | .91  | 72 | -.72  | 1.11 | .04  |
| Total score          | 27 | -.25  | 1.05 | 72 | -.37  | .98  | -.12 |
| <br><i>MABC-2</i>    |    |       |      |    |       |      |      |
| Posting coins (d)    | 72 | 10.61 | 2.27 |    |       |      |      |
| Posting coins (nd)   | 71 | 10.83 | 2.69 | 72 | 10.79 | 2.70 | .01  |
| Beads                | 71 | 10.66 | 2.22 | 72 | 10.68 | 2.23 | -.01 |
| Drawing trail        | 72 | 10.01 | 2.50 |    |       |      |      |
| Catching a bean bag* | 72 | 10.60 | 2.56 |    |       |      |      |
| Throwing a bean bag* | 71 | 10.85 | 3.11 |    |       |      |      |
| One-leg stand        | 68 | 8.88  | 1.82 | 72 | 8.85  | 1.86 | .02  |
| Walking on toes      | 68 | 10.01 | 2.87 | 72 | 9.96  | 2.89 | .02  |
| Jumping on mats      | 70 | 10.06 | 2.49 | 72 | 10.04 | 2.53 | .01  |
| Manual dexterity     | 70 | 10.93 | 3.08 | 72 | 10.86 | 3.09 | -.02 |
| Aiming & catching    | 71 | 10.90 | 3.05 | 72 | 10.93 | 3.04 | .01  |
| Balance              | 65 | 9.57  | 2.98 | 72 | 9.62  | 3.02 | .02  |
| Total score          | 63 | 11.00 | 3.45 | 72 | 10.80 | 3.37 | -.06 |

---

*Note.* \*Pooled descriptives are not available for these items, because they were not imputed. d: dominant; nd: nondominant.

Table B.2

*Descriptives on the ZNA-2 and the MABC-2 in 4-year old children*

|                          | Original |          |           | Pooled   |          |           | Effect size |
|--------------------------|----------|----------|-----------|----------|----------|-----------|-------------|
|                          | <i>n</i> | <i>M</i> | <i>SD</i> | <i>n</i> | <i>M</i> | <i>SD</i> |             |
| <i>ZNA-2</i>             |          |          |           |          |          |           |             |
| Pegboard (d)             | 52       | .33      | 1.13      | 54       | .32      | 1.13      | .01         |
| Pegboard (nd)            | 52       | .03      | 1.16      | 54       | .03      | 1.17      | .00         |
| Bolts (d)                | 53       | .82      | .91       | 54       | .83      | .92       | -.01        |
| Bolts (nd)               | 54       | .70      | .93       | 54       | .70      | .93       | .00         |
| Beads                    | 54       | .24      | 1.07      | 54       | .24      | 1.07      | .00         |
| Repetitive foot (d)*     | 53       | -.32     | 1.15      |          |          |           |             |
| Repetitive foot (nd)*    | 54       | -.25     | 1.12      |          |          |           |             |
| Alternating foot (d)*    | 52       | -.03     | 1.14      |          |          |           |             |
| Alternating foot (nd)*   | 52       | .08      | .98       |          |          |           |             |
| Repetitive hand (d)*     | 53       | -.60     | 1.57      |          |          |           |             |
| Repetitive hand (nd)*    | 51       | -.67     | 1.41      |          |          |           |             |
| Alternating hand (d)*    | 51       | -.33     | 1.24      |          |          |           |             |
| Alternating hand (nd)*   | 53       | -.27     | 1.35      |          |          |           |             |
| Repetitive fingers (d)*  | 54       | .02      | 1.43      |          |          |           |             |
| Repetitive fingers (nd)* | 52       | -.12     | 1.45      |          |          |           |             |

---

|                          |    |       |      |    |       |      |      |
|--------------------------|----|-------|------|----|-------|------|------|
| Sequential fingers (d)*  | 51 | .50   | 1.21 |    |       |      |      |
| Sequential fingers (nd)* | 50 | .31   | 1.09 |    |       |      |      |
| Jumping sideways         | 51 | -.06  | .69  | 54 | -.05  | .69  | -.01 |
| Chair rise               | 52 | -.19  | 1.32 | 54 | -.15  | 1.33 | -.03 |
| Long jump                | 50 | .30   | 1.16 | 54 | .24   | 1.21 | .05  |
| Fine motor skills        | 52 | .65   | 1.06 | 54 | .63   | 1.05 | -.02 |
| Pure motor skills        | 41 | -.08  | 1.16 | 54 | -.24  | .86  | -.19 |
| Static balance           | 45 | -.53  | .96  | 54 | -.62  | 1.01 | -.09 |
| Dynamic balance          | 46 | .04   | .98  | 54 | .03   | .98  | .00  |
| Total score              | 28 | -.03  | 1.00 | 54 | -.07  | .97  | -.04 |
| <i>MABC-2</i>            |    |       |      |    |       |      |      |
| Posting coins (d)        | 53 | 10.85 | 2.63 | 54 | 10.84 | 2.63 | .00  |
| Posting coins (nd)       | 53 | 10.25 | 2.22 | 54 | 10.24 | 2.22 | .00  |
| Beads                    | 53 | 9.98  | 2.20 | 54 | 9.95  | 2.22 | .01  |
| Drawing trail            | 53 | 8.68  | 2.30 | 54 | 8.66  | 2.31 | .01  |
| Catching a bean bag*     | 53 | 8.77  | 2.61 |    |       |      |      |
| Throwing a bean bag*     | 54 | 9.85  | 2.65 |    |       |      |      |
| One-leg stand            | 53 | 8.31  | 2.53 | 54 | 8.26  | 2.56 | .02  |
| Walking on toes          | 52 | 9.9   | 3.27 | 54 | 9.87  | 3.30 | .01  |
| Jumping on mats          | 53 | 9.62  | 3.27 | 54 | 9.62  | 3.26 | .00  |
| Manual dexterity         | 53 | 9.57  | 2.57 | 54 | 9.56  | 2.55 | .00  |
| Aiming & catching        | 53 | 9.17  | 2.38 | 54 | 9.17  | 2.36 | .00  |

---

|             |    |      |      |    |      |      |     |
|-------------|----|------|------|----|------|------|-----|
| Balance     | 52 | 9.06 | 3.15 | 54 | 9.08 | 3.11 | .01 |
| Total score | 51 | 9.08 | 2.35 | 54 | 9.11 | 2.38 | .01 |

*Note.* \*Pooled descriptives are not available for these items, because they were not imputed. d: dominant; nd: nondominant.

Table B.3

*Descriptives on the ZNA-2 and the MABC-2 in 5-year old children*

|                        | Original |          |           | Pooled   |          |           | Effect size |
|------------------------|----------|----------|-----------|----------|----------|-----------|-------------|
|                        | <i>n</i> | <i>M</i> | <i>SD</i> | <i>n</i> | <i>M</i> | <i>SD</i> |             |
| <i>ZNA-2</i>           |          |          |           |          |          |           |             |
| Pegboard (d)           | 42       | -.01     | .73       | 43       | .01      | .75       | -.03        |
| Pegboard (nd)          | 43       | .06      | 1.21      |          |          |           |             |
| Bolts (d)              | 42       | -.03     | .93       | 43       | -.04     | .93       | .01         |
| Bolts (nd)             | 43       | -.07     | .95       |          |          |           |             |
| Beads                  | 43       | .19      | 1.16      |          |          |           |             |
| Repetitive foot (d)*   | 40       | .04      | 1.25      |          |          |           |             |
| Repetitive foot (nd)*  | 40       | .13      | 1.23      |          |          |           |             |
| Alternating foot (d)*  | 42       | .07      | 1.163     |          |          |           |             |
| Alternating foot (nd)* | 42       | .07      | .97       |          |          |           |             |
| Repetitive hand (d)*   | 41       | -.07     | 1.77      |          |          |           |             |
| Repetitive hand (nd)*  | 41       | -.27     | 1.52      |          |          |           |             |
| Alternating hand (d)*  | 41       | -.20     | 1.20      |          |          |           |             |
| Alternating hand (nd)* | 41       | .32      | 1.38      |          |          |           |             |

---

|                          |    |       |      |    |       |      |      |
|--------------------------|----|-------|------|----|-------|------|------|
| Repetitive fingers (d)*  | 41 | .03   | 1.38 |    |       |      |      |
| Repetitive fingers (nd)* | 40 | .07   | 1.42 |    |       |      |      |
| Sequential fingers (d)*  | 40 | .28   | 1.29 |    |       |      |      |
| Sequential fingers (nd)* | 39 | .33   | 1.34 |    |       |      |      |
| Jump sideways            | 38 | -.02  | 1.26 | 43 | -.02  | 1.22 | .00  |
| Chair rise               | 39 | -.15  | 1.31 | 43 | -.05  | 1.34 | -.07 |
| Long jump                | 41 | -.04  | 1.26 | 43 | -.01  | 1.27 | -.02 |
| Fine motor skills        | 41 | .03   | .85  | 43 | .06   | .85  | .04  |
| Pure motor skills        | 35 | .15   | 1.39 | 43 | .12   | 1.00 | -.03 |
| Static balance           | 38 | -.90  | 1.18 | 43 | -.68  | 1.35 | .22  |
| Dynamic balance          | 33 | -.27  | 1.33 | 43 | -.05  | 1.33 | -.17 |
| Total score              | 26 | -.50  | 1.07 | 43 | -.20  | 1.19 | .25  |
| <i>MABC-2</i>            |    |       |      |    |       |      |      |
| Posting coins (d)        | 42 | 10.40 | 2.96 | 43 | 10.39 | 2.95 | .00  |
| Posting coins (nd)       | 41 | 10.59 | 2.33 | 43 | 10.54 | 2.36 | .02  |
| Beads                    | 42 | 9.60  | 2.86 | 43 | 9.58  | 2.85 | .01  |
| Drawing trail            | 43 | 8.51  | 2.33 |    |       |      |      |
| Catching a bean bag*     | 41 | 8.46  | 3.18 |    |       |      |      |
| Throwing a bean bag*     | 43 | 9.84  | 3.00 |    |       |      |      |
| One-leg stand            | 43 | 7.38  | 2.62 |    |       |      |      |
| Walking on toes          | 42 | 9.12  | 3.05 | 43 | 9.12  | 3.05 | .00  |
| Jumping on mats          | 43 | 9.05  | 3.47 |    |       |      |      |

---

|                   |    |      |      |    |      |      |      |
|-------------------|----|------|------|----|------|------|------|
| Manual dexterity  | 41 | 9.41 | 2.46 | 43 | 9.38 | 2.48 | -.01 |
| Aiming & catching | 41 | 8.98 | 3.13 | 43 | 9.09 | 3.12 | .04  |
| Balance           | 42 | 8.00 | 2.88 | 43 | 7.95 | 2.87 | -.02 |
| Total score       | 38 | 8.39 | 3.25 | 43 | 8.42 | 3.08 | .01  |

*Note.* \*Pooled descriptives are not available for these items, because they were not imputed. d:

dominant; nd: nondominant.
